# Supplementary material
Source: publisher figshare collection journal article supplement (https://gsapubs.figshare.com/ndownloader/files/40803617)
Supplement: Supplementary file 1 [file 40803617]

## Sheet: Sheet1
TABLE S2. Charcoal-accumulation rate (CHAR) calculations for samples from the Barstow Formation, California. FA = facies association; SAR = sediment-accumulation rate.
Sample	FA	Preferred age (Ma)	Mass (g)	Density (g/cm3)	Grain count	Volume (cm3)	Concentration (grains/cm3)	FA SAR (m/Myr)	FA SAR (cm/yr)	CHAR
TT-2-6	6	13.27	4.75	2.6	263	1.82692	143.958	149	0.0149	2.14497
TT-2-2	6	13.46	4.81	2.6	246	1.85	132.973	149	0.0149	1.9813
TT-1-15-11	6	13.47	4.87	2.6	485	1.87308	258.932	149	0.0149	3.85809
TT-1-2	6	13.48	4.73	2.6	1159	1.81923	637.082	149	0.0149	9.49253
TT-1-15-2	6	13.48	4.8	2.6	40	1.84615	21.6667	149	0.0149	0.322833
TT-1-15-10	6	13.48	4.82	2.6	160	1.85385	86.3071	149	0.0149	1.28598
TT-1-15-9	6	13.5	4.88	2.6	12	1.87692	6.39344	149	0.0149	0.0952623
RH-15-1-1	6	13.77	4.76	2.6	164	1.83077	89.5798	149	0.0149	1.33474
OC-2-9	5	13.78	4.99	2.6	0	1.91923	0	120	0.012	0
OC-1-7	5	13.89	5.06	2.6	13	1.94615	6.67984	120	0.012	0.0801581
FW-3-9	6	14.14	4.94	2.6	41	1.9	21.5789	149	0.0149	0.321526
OC-2-8	5	14.59	5.07	2.6	8	1.95	4.10256	120	0.012	0.0492308
FE-16-5	6	14.6	4.98	2.6	143	1.91538	74.6586	149	0.0149	1.11241
OC-2-7	5	14.88	5.04	2.6	3	1.93846	1.54762	120	0.012	0.0185714
FW-2-15-3	5	14.98	4.82	2.6	209	1.85385	112.739	120	0.012	1.35286
OC-2-6	2	15.13	4.98	2.6	10	1.91538	5.22088	306	0.0306	0.159759
RB-16-5-2	4	15.26	4.8	2.6	12	1.84615	6.5	357	0.0357	0.23205
OC-2-3	2	15.52	5.24	2.6	10	2.01538	4.96183	306	0.0306	0.151832
CUP-3-2	3	15.74	5.15	2.6	9	1.98077	4.54369	266	0.0266	0.120862
COO-2-15-2	3	15.9	4.61	2.6	64	1.77308	36.0954	266	0.0266	0.960139
OC-1-4	2	15.97	4.99	2.6	91	1.91923	47.4148	306	0.0306	1.45089
CUP-1-4-2	3	16.01	5.23	2.6	10	2.01154	4.97132	266	0.0266	0.132237
CUP-1-4-1	3	16.04	5.02	2.6	3	1.93077	1.55378	266	0.0266	0.0413307
OC-1-6	2	16.23	4.98	2.6	4	1.91538	2.08835	306	0.0306	0.0639036
CUP-1-6	3	16.36	4.98	2.6	9	1.91538	4.6988	266	0.0266	0.124988
OC-1-3	1	16.48	5.08	2.6	23	1.95385	11.7717	309	0.0309	0.363744
